## Correction for: Comprehensive analysis of prognostic value, relationship to cell cycle, immune infiltration and m6A modification of ZSCAN20 in hepatocellular carcinoma

Fang Jiayu<sup>1,2,\*</sup>, Yike Jiang<sup>2,\*</sup>, Xuanrui Zhou<sup>2</sup>, Minqin Zhou<sup>2</sup>, Jingying Pan<sup>2</sup>, Yun Ke<sup>2</sup>, Jing Zhen<sup>2</sup>, Da Huang<sup>3</sup>, Weifan Jiang<sup>4</sup>

<sup>1</sup>Second Affiliated Hospital of Nanchang University, Nanchang, China

<sup>2</sup>Second College of Clinical Medicine, Nanchang University, Nanchang, China

<sup>3</sup>Department of Thyroid Surgery, Second Affiliated Hospital of Nanchang University, Nanchang, China

<sup>4</sup>Department of Urology, Second Affiliated Hospital of Nanchang University, Nanchang, China

\*Equal contribution

**Correspondence to:** Weifan Jiang; email: [wwwsx012@163.com](mailto:wwwsx012@163.com), <https://orcid.org/0000-0002-6119-6903>

**Keywords:** hepatocellular carcinoma, ZSCAN20, biomarker, prognosis, immune infiltrates

**Original article:** *Aging (Albany NY)* 2022; 14: pp 9550-9578

PMID: [36462500](https://pubmed.ncbi.nlm.nih.gov/36462500/)

PMCID: [PMC9792207](https://pubmed.ncbi.nlm.nih.gov/PMC9792207/)

doi: [10.18632/aging.204312](https://doi.org/10.18632/aging.204312)

**This article has been corrected:** The authors updated the text of the **Quantitative real-time PCR** section with the sequences of the real-time PCR primers.

Corrected **Materials and methods** section is presented below.

### Quantitative real-time PCR

Real-time PCR was performed on fresh frozen samples. Total RNA was isolated from tissues using the TRIzol reagent (Thermo Fisher Scientific). Then, according to standard methods, qRT-PCR analysis was performed to observe the expression level of ZSCAN20. Primers for ZSCAN20 from 5' to 3': TGGCCTGGTCAATGTTGAGT (F), TGCACACCTGCAATACGACT (R). Primers for  $\beta$ -actin from 5' to 3': TGGAACGGTGAAGGTGACAG (F), AACAACGCATCTCATATTTGGAA (R).
